# Supplementary material
Source: PubMed Central journal article supplement (PMC6990653)
Supplement: jamasurg-155-233-s001.pdf [file jamasurg-155-233-s001.pdf]

## **Using multimodal prehabilitation to improve outcomes for frail patients undergoing resection of colorectal cancer**

### **BACKGROUND**

Colorectal cancer is the third most common cancer in North America, and it is the second leading cause of cancer death in both men and women (1). The median age at diagnosis is 69 years (2) and the primary approach to treatment of colorectal cancer and the only curative approach is surgery (3). In 2013, 6300 persons were diagnosed with colorectal cancer in Quebec and 5229 underwent colorectal resection with a mean hospital stay of 11 days (4). Within the McGill hospitals, approximately 600 patients underwent colorectal resection in 2013 at the Montreal General Hospital and Jewish General Hospital with a mean length of stay of 9 days. These resections required 5400 bed-days, the large majority of which were needed for the postoperative recovery period. Clearly, rapid return to full functioning after colorectal cancer surgery has the potential to improve outcomes for patients e.g. allowing them to return home and resume normal activities earlier and begin other adjuvant treatments promptly. Furthermore accelerated early recovery after colorectal cancer surgery would also have health-economic benefits including more efficient use of available hospital beds for this type of surgery.

### **Recovering from the stress of surgery and colorectal cancer**

Despite major advances in surgical technology, anaesthesia, analgesia, and perioperative care, complications after colorectal resection occur in 25-60% of patients. As such, colorectal surgery is an important target for quality improvement and is the general surgery procedure with the greatest proportion of adverse outcomes and longest length of hospital stay (5, 6). Even in patients without medical or surgical complications, major abdominal surgery is associated with a 40% reduction in functional capacity. As a result an extended period of recovery is required, and this is especially true for the elderly (7). Patients experience physical fatigue, disturbed sleep and a decreased ability to concentrate for up to 4 weeks after discharge (8), and their functional capacity is not fully recovered even 6-9 weeks after surgery (9, 10). Preoperative health status, functional capacity and muscle strength predict postoperative fatigue and complications (11, 12). Thus the elderly, persons with cancer and frail subjects with limited physiological reserve are the most susceptible to the negative effects of surgery (13, 14). Identifying ways to reduce the rate of post-operative complications, especially in high risk groups such as frail patients with cancer, would be of great practical benefit.

### **Why surgical prehabilitation?**

Rehabilitation after surgery is now well-established for some surgical specialties and procedures. There have also been efforts to improve the surgical recovery by optimizing interventions during the intra-operative period (15). However relatively little emphasis has been placed on optimizing patient physical function in the pre-operative period, yet this offers many advantages as it is not affected by post-operative symptoms e.g. fatigue, or by concerns about disrupting the surgical incision site or dressings. For most elective procedures, including colorectal surgery, there is a waiting period prior to surgery, and this time on the waiting list when patients are motivated and available, is as an opportunity to intervene in a targeted fashion to try and improve post-operative recovery. Active engagement of the individual in the preparation process, may have benefits beyond the physical, and alleviate some of the

emotional distress surrounding the anticipation of surgery and the recovery process. *Prehabilitation* can be defined as a process designed to improve functional capacity in anticipation of an upcoming surgical stressor (16). The theoretical framework is based on the assumption that selected preoperative interventions can improve a patient's baseline physiological status, and thus help develop a buffer of functional capacity to mitigate the predictable detrimental effects of the upcoming surgery. In this way the patient will be better prepared for surgery and able to achieve an earlier return to normal functioning after surgery. Three systematic reviews (17-19) assessing the effect of preoperative exercise therapy on various clinical outcomes (pain, length of hospital stay, postoperative complication rate) in a variety of surgical procedures (6 orthopedic, 4 cardiac, 1 vascular and 1 abdominal) indicated that physical activity has a positive impact on postoperative length of hospital stay and complications. However, very little work has been done in abdominal surgery (1 study in the systematic reviews) and this study was not done in patients in whom all aspects of perioperative care were optimized.

### **Preparing the patient for surgery**

#### *a. Enhanced Recovery After Surgery (ERAS) program*

The ERAS program for colorectal resection (20), which includes a bundle of evidence-based perioperative elements (e.g. patient education, optimization of medical conditions, glycemic control, smoking and alcohol cessation, minimally invasive surgery, epidural analgesia, early nutrition and mobilization), is associated with significantly less postoperative morbidity and shortened length of hospital stay (21).

#### *b. Physical activity*

Physical activity remains the cornerstone of the prehabilitation program. The benefits of a physically active lifestyle are innumerable and have been demonstrated in many disabling conditions (hypertension, diabetes, coronary heart disease, arthritis). Increased physical activity and fitness, in the elderly population as well as in cancer patients, is associated with decreased all-cause mortality, morbidity, and disability (22-24). In surgical patients, low cardiorespiratory fitness, as defined by formal testing (e.g. aerobic threshold <10.9 ml/kg/min) or walking capacity (eg 6-minute walk test distance <390 m) is associated with higher risk of postoperative complications (25-27). Since physical fitness can be considered a modifiable risk-factor for postoperative complications, it would seem advantageous to use the preoperative period to improve fitness with a structured prehabilitation program.

#### *c. Enhancing nutrition*

Colon cancer patients may have a variety of non-specific gastrointestinal and abdominal symptoms leading to poor caloric intake. Moreover, the malignancy itself may exert a chronic systemic inflammation response that manifests as perturbations in glucose metabolism, insulin resistance, and blunted whole body protein anabolism and weight loss and cachexia (28). Over half of patients presenting for colorectal resection will have had significant preoperative weight loss, and up to 20% of patients will have lost more than 10% of their body weight (29, 30). Preoperative malnutrition is an independent predictor for mortality after colorectal cancer surgery, with an odds ratio of 1.33 (31). Additional evidence for nutritional optimization is based

on the fact that exercise and dietary protein interact synergistically to produce greater gains in fat-free mass, greater muscle protein synthesis and increased strength (32). Protein intake is the primary stimulus for muscle protein synthesis, and whey is rich in leucine, thus playing a key role in muscle protein synthesis by regulating the mTOR protein signaling pathway (33).

#### *d. Modulating anxiety and depression*

The preoperative period is a difficult time period for cancer patients. They express fear of the uncertainty and of death. Moreover, most patients undergoing operations for malignancy become increasingly anxious and depressed as the days progress during the waiting period. A relationship between stress and wound repair is not only statistically significant, but also clinically relevant (34). A systematic review of the impact of psychosocial status on postoperative outcomes showed that perceived stress and worry about the operation are both associated with prolonged recovery, postoperative complications, and impaired wound healing in elective surgery (35).

#### **Our experience with surgical prehabilitation**

Our multidisciplinary group at the MGH has conducted research on prehabilitation in colorectal cancer patients and using a perioperative ERAS program that started in 2010. The initial research work focused on the impact of 4-weeks of preoperative intense exercise on postoperative functional walking capacity, assessed using the validated 6min walk test (6MWT) as the primary outcome (36). This randomized controlled trial (RCT) (37) identified that intense exercise alone may not be the optimal intervention approach in this population leading us to consider additional elements namely nutritional enhancement and strategies to deal with anxiety and depression (38). Similarly, a pilot study using a nutritional intervention alone demonstrated only a positive although modest increase in functional capacity (39). Based on this early work, a pilot study (40) followed by a RCT (41) using a trimodal 4-week prehabilitation program (home-based moderate aerobic and resistance exercise, nutrition counselling and daily whey protein supplementation, and anti-anxiety relaxation strategies) confirmed a synergistic effect of exercise and nutrition that extended beyond the preoperative period. In this RCT, patients were randomized to either begin the trimodal intervention in the preoperative period (Prehab group) or after surgery (Rehab group), with 6MWT used as the primary outcome to estimate recovery. In the Prehab group, over 80% of patients were returned to baseline functional walking capacity 8 weeks after surgery; whereas only 60% of the Rehab group that started the program after surgery, and only 40% of a historical controls receiving neither prehabilitation, nor rehabilitation, had returned to baseline. Though we have found more rapid recovery of walking capacity with prehabilitation, we have not observed differences in clinical outcomes such as postoperative complications when studying unselected colorectal cancer patients. Thus we believe that a more focussed approach which targets prehabilitation to patients at greater risk of post-operative complications will be the most effective way to deploy this type of intervention. Specific subgroups of colorectal surgery patients, such as the elderly frail, may be more likely to benefit clinically from prehabilitation. Frailty is an emerging concept in clinical medicine and the Fried score for frailty, with 5 phenotypic criteria (weight loss, weakness, exhaustion, low physical activity, and slow walking speed), is commonly used to diagnose frailty (42). Evidence suggests that patients preoperatively identified as intermediately frail (Fried score 2-3) and frail (Fried score 4-5) are at increased risk for complications after surgery (14). As our multimodal prehabilitation program tackles important domains of frailty

(physical, nutritional and psychological), we believe that targeting the intervention to patients with higher Fried scores may be a resource-effective way to provide prehabilitation and ultimately improve postoperative outcomes. In a subset of 50 patients having colorectal surgery at the Montreal General Hospital, we found that 25% were intermediately frail or frail with an average age of 72 years, ASA 3 and 6MWT of 316 m. Interestingly, patients with 6MWT < 400 m at baseline had increased the 6 minute walking distance by an average of 45 m after 4 weeks of prehabilitation (minimal important difference is 20 m) (43). This finding suggests that the physiological reserve of frail patients can indeed be increased even within a short period of prehabilitation leading to greatest benefits in terms of reducing or preventing post-operative complications and accelerating their recovery.

## **HYPOTHESIS**

- 1) Prehabilitation using a 4-week multimodal protocol in frail (Fried score >2) patients will reduce postoperative complications after surgery for colorectal cancer compared to use of post-operative rehabilitation.
- 2) The addition of a prehabilitation is more effective than post-operative rehabilitation alone in improving markers of early post-operative recovery and health-related quality of life in patients with this population.

## **OBJECTIVES**

We will use this multicenter trial at the MGH and JGH to explore whether prehabilitation can improve outcomes in frail elderly patients undergoing colorectal surgery. Further analysis will also be made to see if this intervention is cost effective.

## **PATIENTS AND METHODS**

The study is based on our previously published RCT and is designed as a single-blind parallel-arm superiority RCT (Prehabilitation vs Rehabilitation). This design allows us to assess the impact of adding either 4-week prehabilitation intervention or 4-week rehabilitation intervention on surgical complications and length of hospital stay, as well as the overall impact on functional capacity and quality of life at 30-days post hospital discharge. In addition this design has been chosen to avoid the risk of bias and poor recruitment if we were to offer only a non-intervention control group. The 4-week period interval between diagnosis and surgery is within the time recommended by the Canadian Oncological Society (44). Perioperative care will be based on the ERAS colorectal guidelines (20), fully functional at the MGH since 2010 (45) and initiated at the JGH this year. The trajectory of the study is presented in Figure 1. Patients scheduled for colorectal surgery will be recruited at the surgical clinics by the clinical coordinator and will be screened for frailty (Fried score) after having been identified by the surgeons as candidates for surgery. Patients are ineligible if the Fried score <2, they do not speak English or French, if they have premorbid conditions that contraindicate exercise, including dementia, Parkinson disease or previous stroke with paresis, and taking carbidopa/levodopa, donepezil hydrochloride, or long standing antidepressants. All eligible patients will perform baseline measurements (Table 1) administered by a person not aware of group allocation and study hypothesis, and thereafter they will be randomly assigned on a 1:1 ratio by computer generated random numbers either to prehabilitation (Prehab) group or to rehabilitation (Rehab) group. The Prehab group will undergo a physical and nutritional assessment and receive instructions on the home-based

multimodal program by a kinesiologist and a nutritionist respectively. The program will then start and continue for 4 weeks before surgery (see prescription in Figure 2). During this time the patients will also receive one supervised exercise session per week for 4 weeks at the hospital lab. The Rehab group, instead, will undergo the assessment by the kinesiologist and the nutritionist two days before surgery and will start the multimodal program at home after hospital discharge and continue for 4 weeks, with one supervised exercise session per week at the hospital lab (Figure 1). Measurements (Table 1) will be taken before randomization (Baseline), two days before surgery (Preop), at hospital discharge (Discharge) and 4 weeks after hospital discharge (4 weeks postop). To facilitate adherence to the multimodal program, all patients will receive a standard instructional booklet with a diary where the patients will be asked to document all activities (exercise, diet, symptoms, pain) related to the program. The protocol has already been approved by the MGH ethics board, will be submitted to the JGH ethics board and is registered on ClinicalTrials.gov.

### **Outcome measures**

The measurements will be completed as shown in Table 1. The primary outcome will be the Comprehensive Complications Index (CCI) based on the postoperative complications recorded up to 30 days after surgery and graded by severity using the Clavien-Dindo classification (46). Classification grades will then be converted into the CCI, which integrates all complications with their respective severities on a continuous scale ranging from 0 (no burden from complications) to 100 (death). Previous studies supported the validity of the CCI as a measure of postoperative morbidity and suggested that, in comparison to traditional morbidity measures (e.g. rate overall complications, rate of severe complications), it provides a more comprehensive and sensitive endpoint for studies evaluating strategies to reduce postoperative complications (47, 48). Thus we have chosen the CCI as primary outcome as it represents the most definitive and clinically relevant measure of global impact for this intervention. Secondary outcomes will include: hospital length of stay, 30-day readmission rates, functional walking capacity, anxiety and depression and health-related quality of life at 30-days post-discharge.

### **Statistics and sample size**

Sample size requirement for this trial was estimated for an  $\alpha$  level of 0.05 and 90% power to detect a 10 point difference in the CCI scale between groups. This difference of 10 points is considered clinically relevant as it reflects 1-grade difference in the Clavien-Dindo classification. In a previous work (49) at the MGH and JGH the mean CCI was 10.45 (SD 15.8). Based on these estimates, a sample of 60 participants per group is considered sufficient for our analysis and accounts for a possible increase in data variance. Assuming that 396 patients (66% of the total 600) diagnosed with colorectal cancer are operated each year in both hospitals, approximately 99 of these patients (25%) will be classified as intermediately frail or frail. Based on previous trial experience, approximately 80% of these patients will be eligible and agree to participate. Therefore, we estimate that 120 participants can be feasibly enrolled in one and half years. Linear regression will be used to estimate the extent to which prehabilitation decreases CCI scores in comparison to rehabilitation. The impact of prehabilitation on secondary outcome measures will be analyzed using cox-regression and logistic regression. Both crude and adjusted coefficients will be reported. The analysis will be performed according to an intention-to-treat principle, with participants being analyzed in the groups to which they were allocated. To minimize potential bias arising from missing data from incomplete assessments or losses to

follow-up, multiple imputations will be carried out.

#### **RELEVANCE AND FUTURE OUTLOOK**

The proposed study represents an opportunity to intervene, treat or prevent impairments in a specific at-risk population: namely the intermediate frail and frail patients undergoing surgical resection of colorectal cancer. Combining targeted physical, nutritional and psychological interventions with medical optimization in a multimodal approach is likely to offer the best overall care. The results will also provide vital new evidence about whether a 4-week prehabilitation intervention is sufficient to impact postoperative outcomes. Importantly we have focused on those patients who have the most potential benefit from the prehabilitation program. Increasing functional reserve in frail patients has the greatest chance of positively impacting on complications and length of hospital stay. We believe the results of this study will be generalizable to other types of cancer, and will emphasize the notion of how important is to take advantage of this window of opportunity for each cancer patient population in order to improve patient outcomes and reduce direct and indirect health care costs.

#### **TEAM**

**MUHC:** F Carli, S Liberman, J Fiore, C Scheede-Bergdahl

**JGH:** T Jagoe, M Boutros, G Ghitulescu, N Morin

**Collaborators:** B Stein, P Charlebois, A Bergdahl, J Morais, C Vasilevsky

## APPENDIX

### References

1. Canadian Cancer Society's Steering Committee on cancer statistics: Colorectal cancer at a glance 2011. Toronto, ON
2. Howlader N, Noone AM, Krapcho M et al SEER Cancer Statistics Review, 1975-2009 (Vintage 2009 Populations); 2012.
3. Cancer Statistics Review, 1975-2009 (Vintage 2009 Populations); 2012. [Cited Feb 07, 2015]. Available from: [http://seer.cancer.gov/csr/1975\\_2009\\_pops\\_09/](http://seer.cancer.gov/csr/1975_2009_pops_09/).
4. Canadian Cancer Society's Advisory Committee on Cancer Statistics. Canadian Cancer Statistics 2013. Toronto (ON).
5. Schilling PL, Dimick JB, Birkmeyer JD. Prioritizing quality improvement in general surgery. *J Am Col Surg* 2008; 207(5):698-704.
6. Lucas DJ, Pawlik TM. Quality improvement in gastrointestinal surgical oncology with the American College of Surgeons National Surgical Quality Improvement Program. *Surgery* 2014; 155: 593-601
7. Lawrence V, Hazuda H, Cornell J (2004) Functional independence after major abdominal surgery in the elderly. *Journal of the American College of Surgeons*. 2004;199:762-772
8. Jensen MB, Houborg KB, Norager CB. Postoperative changes in fatigue, physical function and body composition: an analysis of the amalgamated data from randomized trials on patients undergoing colorectal surgery. *Colorectal Dis*. 2011 May; 13(5):588-593.
9. Carli F, Mayo N, Klubien K, et al. Epidural analgesia enhances functional exercise capacity and health-related quality of life after colonic surgery: results of a randomized trial. *Anesthesiology* 2002; 97:540-549.
10. Salmon P, Hall GM. A theory of postoperative fatigue: an interaction of biological, psychological, and social processes. *Pharmacol Biochem Behav* 1997; 56(4):623-628.
11. Cohen ME, Billimoria KY, Ko CY, Hall BL. Development of an American College of Surgeons National Surgical Quality Improvement program: morbidity and mortality risk calculator for colorectal surgery. *J Am Coll Surg* 2009; 208: 1009-16
12. Reilly DF, McNeely MJ, Doerner D, et al (1999) Self-reported exercise tolerance and the risk of serious perioperative complications. *Archives of Internal Medicine*. 1999; 159: 2185-2192.
13. Schroeder D, Hill GL. Predicting postoperative fatigue: importance of preoperative factors. *WorldJSurg* 1993; 17(2):226-231.
14. Makary MA, Segev DL, Pronovost. Frailty as a Predictor of Surgical Outcomes in Older Patients. *J Am Coll Surg* 2010;210:901-908
15. Kehlet H. Manipulation of the metabolic response in clinical practice. *World J Surg* 2000; 24(6):690-695.
16. Carli F, Zavorsky GS. Optimizing functional exercise capacity in the elderly surgical population. *Curr Opin Clin Nutr Metab Care*. 2005 Jan; 8(1): 23-32.
17. Valkenet K, Van de port IGL, Dronkers JJ: The effects of preoperative exercise therapy on postoperative outcome: a systematic review. *Clin Rehabil* 2011; 25: 99-111.
18. Santa Mina D, Clarke D, Ritvo P. Effect of total-body prehabilitation on postoperative outcomes: a systematic review and meta-analysis. *Physiotherapy* 2014; 100: 196-207

19. Lemanu DP, Singh PP, MacCormich AD, Arroll B, Hill AG. Effect of preoperative exercise on cardiorespiratory function and recovery after surgery: a systematic review. *World J Surg* 2013; 37: 711.
20. Nygren J, Thacker J, Carli F, et al. Guidelines for perioperative care in elective rectal/pelvic surgery: Enhanced Recovery After Surgery (ERAS®) Society recommendations. *Clin Nutr*. 2012; 31(6):801-16.
21. Varadhan KK, Neal KR, Dejong CH, et al. The enhanced recovery after surgery (ERAS) pathway for patients undergoing major elective open colorectal surgery: a meta-analysis of randomized controlled trials. *Clin Nutr* 2010; 29: 434-40
22. Bean JF, Vora A, Frontera WR. Benefits of exercise for community-dwelling older adults. *Arch Phys Med Rehabil*. 2004; 85:31-42.
23. Colditz GA, Cannuscio CC, Frazier AL. Physical activity and reduced risk of colon cancer: implications for prevention. *Cancer Causes Control*. 1997 Jul;8(4): 649-667.
24. Quadriatero J, Hoffman-Goetz L. Physical activity and colon cancer. A systematic review of potential mechanisms. *J Sports Med Phys Fitness*. 2003 Jun;43(2): 121-138
25. Wilson RJT, Davies S, Yates D, Redman J, Stone M. Impaired functional capacity is associated with all-cause mortality after major elective intraabdominal surgery. *British Journal of Anaesthesia*. 2010; 105: 297–303.
26. Nutt C, Russell J. Use of the pre-operative shuttle walk test to predict morbidity and mortality after elective major colorectal surgery. *Anaesthesia*. 2012; 67: 839-49.
27. Lee L, Schwartzman K, Zavorsky GS, et al. The association of the distance walked in 6 min with preoperative peak oxygen consumption and complications 1 month after colorectal resection. *Anaesthesia* 2013; 68: 811-6
28. McMillan DC. Systemic inflammation, nutritional status and survival in patients with cancer. *Curr Opin Clin Nutr Metab Care*. 2009 May;12 (3): 223-226.
29. Garth AK, Newsome CM, Simmance N, Crowe TC. Nutritional status, nutrition practices and post-operative complications in patients with gastrointestinal cancer. *J Hum Nutr Diet*. 2010 Aug; 23(4): 393-401.
30. Burden ST, Hill J, Sha\_er JL, Todd C. Nutritional status of preoperative colorectal cancer patients. *J Hum Nutr Diet*. 2010 Aug; 23(4): 402-407.
31. Panis Y, Maggiori L, Caranhac G, Bretagnol F, Vicaud E. Mortality after colorectal cancer surgery: a French survey of more than 84,000 patients. *Ann Surg*. 2011 Nov; 254(5): 738-743.
32. Tang JE, Manolacos JJ, Kujbida GW, et al. Minimal whey protein with carbohydrate stimulates muscle protein synthesis following resistance exercise in trained young men. *Appl Physiol Nutr Metab*. 2007 Dec;32(6):1132-1138
33. Burke LM, Hawley JA, Ross ML et al. Preexercise aminoacidemia and muscle protein synthesis after resistance exercise. *Med Sci Sports Exerc* 2012; 44:1968–77
34. Gouin JP, Janice K. Kiecolt-Glasera, The Impact of Psychological Stress on Wound Healing: Methods and Mechanisms
35. Mavros MN, Athanasiou S, Gkegkes ID, et al. Do psychological variables affect early surgical recovery? *PLoS ONE* 2011; 6(5):e20306.
36. Moriello C, Mayo NE, Feldman L, Carli F: Validating the sixminute walk test as a measure of recovery after elective colon resection surgery. *Arch Phys Med Rehabil* 2008; 89:1083–9



37. Carli F, Charlebois P, Stein B, et al. Randomized clinical trial of prehabilitation in colorectal surgery. *British Journal of Surgery* 2010; 97: 1187-97
38. Mayo NE, Feldman L, Scott S et al. Impact of preoperative change in physical function on postoperative recovery: arguments supporting prehabilitation for colorectal surgery. *Surgery*. 2011; 150: 505-14.
39. Gillis C, Loisel SE, Fiore J Jr, et al. Prehabilitation with whey protein supplementation on perioperative functional exercise capacity in patients undergoing colorectal resection for cancer: A pilot double-blinded randomized controlled trial. Submitted to *Journal of the Academy of Nutrition & Dietetics* 2015. ....
40. Li C, Carli F, Lee L et al. Impact of trimodal prehabilitation programme on functional recovery after colorectal cancer surgery *Surg Endosc* . 2013; 27(4):1072-82
41. Gillis, G, Lee L, Li C et al .Prehabilitation versus Rehabilitation A Randomized Control Trial in Patients Undergoing Colorectal Resection for Cancer. *Anesthesiology* 2014; 121: 937-947
42. Fried LP, Tangen CM, Walston J, et al. Frailty in older adults: evidence for a phenotype. *J Gerontol A Biol Sci Med Sci* 2001;56:M146–M156
43. Antonescu I, Scott S, Tran TT, Mayo NE, Feldman LS, Measuring postoperative recovery: What are clinically meaningful differences? *Surgery* 2014;156:319-27
44. Simunovic M, Rempel E, Thériault ME, et al. Influence of delays to non emergent colon cancer surgery on operative mortality, disease-specific survival and overall survival. *Can J Surg* 2009; 52:E79–86
45. Carli F, Charlebois P, Baldini G, Stein B. Implementation of fast track program for colorectal surgery. *Can J Anesth* 2009; 56: 837-42
46. Dindo D, Demartines N, Clavien PA. Classification of surgical complications - A new proposal with evaluation in a cohort of 6336 patients and results of a survey. *Ann Surg* 2004; 240:205-213.
47. Slankamenac K, Graf R, Barkun J, et al. The comprehensive complication index: a novel continuous scale to measure surgical morbidity. *Ann Surg* 2013; 258:1-7.
48. Slankamenac K, Nederlof N, Pessaux P, et al. The comprehensive complication index: a novel and more sensitive endpoint for assessing outcome and reducing sample size in randomized controlled trials. *Ann Surg* 2014; 260:757-762.
49. Lee L, Mata J, Ghitulescu GA, et al. Cost-effectiveness of enhanced recovery versus conventional perioperative management for colorectal surgery. *Ann Surg* 2014; EPub

Figures & Tables

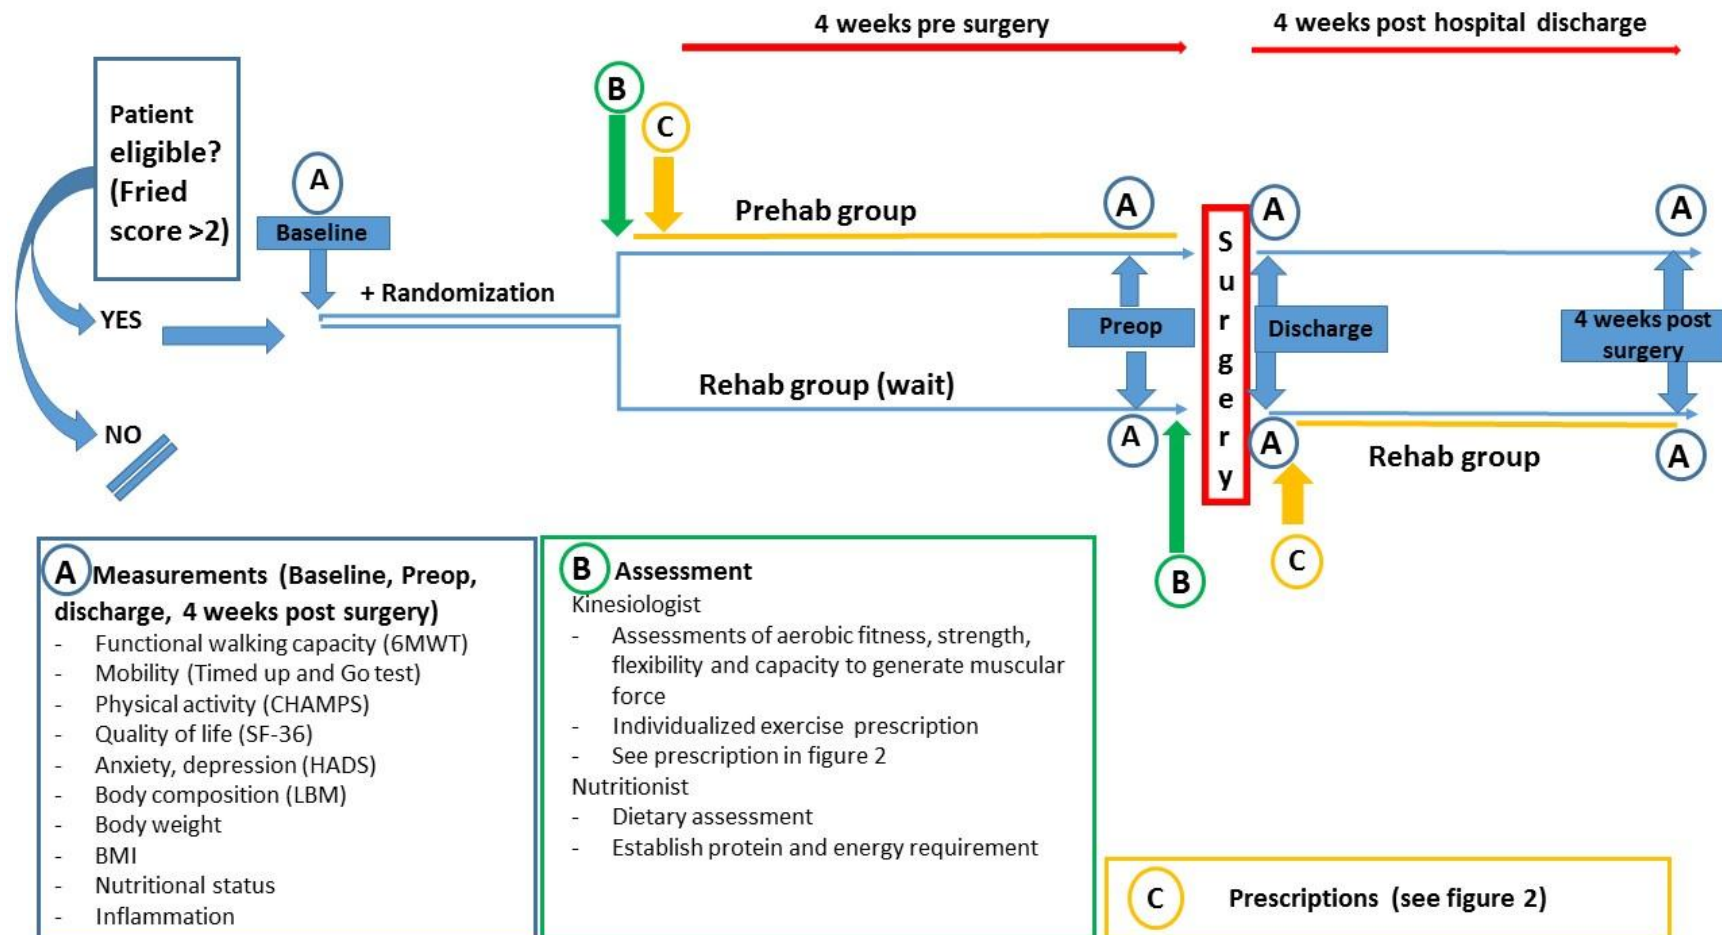

Figure 1 Trajectory of the study

## Multimodal Program

- ➔ **EXERCISE PRESCRIPTION** (home based, 1 supervised session per week)
- Aerobic training:** 3 x 10 minutes per day, pedometer or accelerometer supplied
- Swimming, cycling, walking
  - Intensity: 4-6 on Borg scale (1-10)
- Resistance training:** start with 1 set of 8-12 repetitions and progress gradually, to be performed every second day, resistance bands supplied.
- Major muscle groups: arms, shoulders, upper back, lower back, abdominals, upper leg, lower leg
- Flexibility training:** each stretch is to be held for 20 seconds, to be performed after resistance training
- Chest, arms, upper back/shoulders, quadriceps, hamstrings, calf, lower back
- Exercise program progression:** all exercises will be reviewed by the kinesiologist on a weekly basis to ensure adequate and individualized progression of intensity
- ★
- ➔ **NUTRITIONAL SUPPLEMENTATION:** The nutrition intervention will consist of optimization of protein intake to achieve a daily intake of 1.2 – 1.5 g/kg/d divided in 3 meals and supplemented with whey protein in powder form (10-30g/day)
- ★
- ➔ **STRESS AND ANXIETY REDUCTION TECHNIQUES:** Deep breathing and relaxation will be performed twice daily from supplied CD, 15 minutes each session

Figure 2 Prescriptions of the multimodal program

**Table 1 Measurements and timing**

| <b>Construct</b>                | <b>Measure</b>                                    | <b>Baseline</b> | <b>Preop</b> | <b>Discharge</b> | <b>4 weeks post op</b> |
|---------------------------------|---------------------------------------------------|-----------------|--------------|------------------|------------------------|
| <b>Primary (Confirmatory)</b>   |                                                   |                 |              |                  |                        |
| Postoperative complications     | Comprehensive Complication Index (CCI)            |                 |              |                  | X                      |
| <b>Secondary (Exploratory)</b>  |                                                   |                 |              |                  |                        |
| Time to readiness for discharge | Time to achieve discharge criteria                |                 |              | X                |                        |
| Length of hospital stay         | Time from surgery until actual hospital discharge |                 |              | X                |                        |
| Readmission rate                | Readmission rate                                  |                 |              |                  | X                      |
| Functional walking capacity     | 6MWT                                              | X               | X            | X                | X                      |
| Mobility                        | Time up and go                                    | X               | X            |                  | X                      |
| HRQL                            | SF-36                                             | X               | X            |                  | X                      |
| Physical activity               | CHAMPS, steps                                     | X               | X            |                  | X                      |
| Anxiety & Depression            | HADS                                              | X               | X            |                  | X                      |
| Adherence to the program        | % Compliance to prescriptions                     |                 | X            |                  | X                      |
| <b>Confounding</b>              |                                                   |                 |              |                  |                        |
| Demographics                    | Age, sex, language, education, work               | X               |              |                  |                        |
| Body weight                     | Body weight                                       | X               |              |                  |                        |
| BMI                             | BMI                                               | X               |              |                  |                        |
| Nutritional status              | PG-SGA                                            | X               |              |                  |                        |
| Health Status                   | ASA, morbidity, medications                       | X               |              |                  |                        |
| Dementia                        | Mini-cog test                                     | X               |              |                  |                        |
| Frailty                         | Fried Score                                       | X               |              |                  |                        |
| Surgical incision               | Open, laparoscopic                                | X               |              |                  |                        |
| Tumor stage                     | Tumor stage                                       |                 |              |                  | X                      |
| Inflammation                    | Albumin, CRP, IL-1B, IL-6, creatine kinase        | X               |              |                  |                        |
| Diabetic stage                  | Hb A1C                                            | X               |              |                  |                        |
| Neoadjuvant therapy             |                                                   | X               |              |                  | X                      |
| Adjuvant therapy                |                                                   |                 |              |                  |                        |
| <b>Complications</b>            |                                                   |                 |              |                  |                        |
| Myocardial infarction           |                                                   |                 |              |                  | X                      |
| Stroke                          |                                                   |                 |              |                  | X                      |
| Wound infection                 |                                                   |                 |              |                  | X                      |
| Chest infection                 |                                                   |                 |              |                  | X                      |
| Ileus                           |                                                   |                 |              |                  | X                      |
| Bleeding                        |                                                   |                 |              |                  | X                      |
| Dehiscence                      |                                                   |                 |              |                  | X                      |
| Pulmonary embolism              |                                                   |                 |              |                  | X                      |
| Anastomotic leakage             |                                                   |                 |              |                  | X                      |
| Delirium                        |                                                   |                 |              |                  | X                      |

CCI= Comprehensive Complications Index; 6MWT= 6 minute walk test. HRLQ= Health related quality of life; SF-36 = Short Form 36; CHAMPS= Community Health Activity Model Program; HADS=Hospital Anxiety Depression Scale; BMI = Body Mass Index; PG-SGA = Patient Generated- Subjective Global Assessment; ASA= American Society of Anesthesiologists; CRP= C-reactive Protein; Hb A1C = glycosylate hemoglobin.
