# Supplementary material
Source: PubMed Central journal article supplement (PMC6990653)
Supplement: jamasurg-155-233-s002.pdf [file jamasurg-155-233-s002.pdf]

## Supplementary Online Content

Carli F, Bousquet-Dion G, Awasthi R, et al. Effect of multimodal prehabilitation vs postoperative rehabilitation on 30-day postoperative complications for frail patients undergoing resection of colorectal cancer: a randomized clinical trial. *JAMA Surg*. Published online January 22, 2020. doi:10.1001/jamasurg.2019.5474

**eMethods 1.** Fried Frailty Scoring Index

**eMethods 2.** Definition of Complications

**eMethods 3.** Statistical Analysis Plan

**eTable 1.** Detailed Description of Postoperative Complications in the Prehabilitation vs Rehabilitation Groups

**eTable 2.** Intention to Treat Unadjusted Postoperative Outcomes in the Prehabilitation vs Rehabilitation Groups

**eTable 3.** Intention to Treat Unadjusted Walking Capacity in the Prehabilitation vs Rehabilitation Groups

**eTable 4.** Intention to Treat Unadjusted Patient-Reported Outcome Measures in the Prehabilitation vs Rehabilitation Groups

**eTable 5.** Per Protocol Baseline and Operative Characteristics in the Prehabilitation vs Rehabilitation Groups

**eTable 6.** Per Protocol Adjusted postoperative outcomes in the Prehabilitation vs Rehabilitation Groups

**eTable 7.** Per Protocol Adjusted Walking Capacity in the Prehabilitation vs Rehabilitation Groups

**eTable 8.** Per Protocol Adjusted Patient-Reported Outcome Measures in the Prehabilitation vs Rehabilitation Groups

**eReferences.**

This supplementary material has been provided by the authors to give readers additional information about their work.

## eMethods 1. Fried Frailty Scoring Index

|                                                                                                                                                                                                                                                                                                                                                                                                                                                                                                                                                                                                                                                                                                                                                                                                                                                                                                                                                                                                                                                                                                                                                                            |
|----------------------------------------------------------------------------------------------------------------------------------------------------------------------------------------------------------------------------------------------------------------------------------------------------------------------------------------------------------------------------------------------------------------------------------------------------------------------------------------------------------------------------------------------------------------------------------------------------------------------------------------------------------------------------------------------------------------------------------------------------------------------------------------------------------------------------------------------------------------------------------------------------------------------------------------------------------------------------------------------------------------------------------------------------------------------------------------------------------------------------------------------------------------------------|
| <b>1. Shrinking (weight loss)</b>                                                                                                                                                                                                                                                                                                                                                                                                                                                                                                                                                                                                                                                                                                                                                                                                                                                                                                                                                                                                                                                                                                                                          |
| Shrinking was defined through self-report as an unintentional weight loss of >10 pounds in the last year.                                                                                                                                                                                                                                                                                                                                                                                                                                                                                                                                                                                                                                                                                                                                                                                                                                                                                                                                                                                                                                                                  |
| <b>2. Decreased grip strength (weakness)</b>                                                                                                                                                                                                                                                                                                                                                                                                                                                                                                                                                                                                                                                                                                                                                                                                                                                                                                                                                                                                                                                                                                                               |
| Weakness was assessed by grip strength, and was measured directly with a hand-held JAMAR dynamometer (Sammons Preston Rolyan). Three serial tests of maximum grip strength with the dominant hand were performed, and a mean of the 3 values were adjusted by gender and body mass index (BMI). Weakness was defined as an adjusted grip strength in the lowest 20th percentile of a community-dwelling population of adults 65 years of age and older. <ul style="list-style-type: none"><li>– Men met the criteria for weakness if their BMI and grip strength were <math>\leq 24</math> kg/m<sup>2</sup> and <math>\leq 29</math> kg; 24.1–26 kg/m<sup>2</sup> and <math>\leq 30</math> kg; 26.1–28 kg/m<sup>2</sup> and <math>\leq 31</math> kg; &gt;28 kg/m<sup>2</sup> and <math>\leq 32</math> kg, respectively.</li><li>– Women met the criteria for weakness if their BMI and grip strength were <math>\leq 23</math> kg/m<sup>2</sup> and <math>\leq 17</math> kg; 23.1–26 kg/m<sup>2</sup> and <math>\leq 17.3</math> kg; 26.1–29 kg/m<sup>2</sup> and <math>\leq 18</math> kg; and &gt;29 kg/m<sup>2</sup> and <math>\leq 21</math>kg, respectively.</li></ul> |
| <b>3. Exhaustion</b>                                                                                                                                                                                                                                                                                                                                                                                                                                                                                                                                                                                                                                                                                                                                                                                                                                                                                                                                                                                                                                                                                                                                                       |
| Exhaustion was measured by responses to the following 2 statements from the modified 10-item Center for Epidemiological Studies-Depression scale. (1)“I felt that everything I did was an effort” and (2) “I could not get going.” Subjects were asked, “How often in the last week did you feel this way?” Potential responses were: 0=rarely or none of the time (<1 day); 1=some or a little of the time (1–2 days); 2=a moderate amount of the time (3–4 days); and 3=most of the time. Subjects answering either statement with response 2 or 3 met the criteria for exhaustion.                                                                                                                                                                                                                                                                                                                                                                                                                                                                                                                                                                                      |
| <b>4. Low activity</b>                                                                                                                                                                                                                                                                                                                                                                                                                                                                                                                                                                                                                                                                                                                                                                                                                                                                                                                                                                                                                                                                                                                                                     |
| Physical activities were ascertained for the 2 weeks before this assessment using the short version of the Minnesota Leisure Time Activities Questionnaire, and included frequency and duration. Weekly tasks were converted to equivalent kilocalories of expenditure, and individuals reporting a weekly kilocalorie expenditure in the lowest 20th percentile for their gender (men, <383 kcal/week; women, <270 kcal/week) were classified as having low physical activity.                                                                                                                                                                                                                                                                                                                                                                                                                                                                                                                                                                                                                                                                                            |
| <b>5. Slowed walking speed</b>                                                                                                                                                                                                                                                                                                                                                                                                                                                                                                                                                                                                                                                                                                                                                                                                                                                                                                                                                                                                                                                                                                                                             |
| Slowness was measured by averaging 3 trials of walking 15 feet at a normal pace. Individuals with a walking speed in the lowest 20th percentile, adjusted for gender and height, were scored as having slow walking speed. <ul style="list-style-type: none"><li>– Men met criteria if height and walk time were <math>\leq 173</math> cm and <math>\geq 7</math> seconds, or &gt;173 cm and <math>\geq 6</math> seconds, respectively.</li><li>– Women met criteria if height and walk time were <math>\leq 159</math> cm and <math>\geq 7</math> seconds, or &gt;159 cm and <math>\geq 6</math> seconds, respectively.</li></ul>                                                                                                                                                                                                                                                                                                                                                                                                                                                                                                                                         |

Each criterion is scored with a 0 or 1.

**Score 1** = Non-frail

**Score 2-3** = Intermediately frail

**Score 4-5** = Frail

**eMethods 2. Definition of Complications**

|                                                                                                                                                                                                                                                                                                                                                                                                                                                                                                                                                                                                                                                                                                                                                                                                                                                                                                                                                                                                                                                                                                                                                                                                                                                                                                                                                                                                                                                                                                                                                                                                                                                                                                                                                                                                                                                                                                                                                                                                                                                                                                                                                                                                                                                                                                                                                                                                                                                                                                                                                                                                                                                                                                                                                                                                                                                                                                                                                                                                                                                                                                                                                                                                                                                                                                                                                                                                                                                                                                                                                                             |
|-----------------------------------------------------------------------------------------------------------------------------------------------------------------------------------------------------------------------------------------------------------------------------------------------------------------------------------------------------------------------------------------------------------------------------------------------------------------------------------------------------------------------------------------------------------------------------------------------------------------------------------------------------------------------------------------------------------------------------------------------------------------------------------------------------------------------------------------------------------------------------------------------------------------------------------------------------------------------------------------------------------------------------------------------------------------------------------------------------------------------------------------------------------------------------------------------------------------------------------------------------------------------------------------------------------------------------------------------------------------------------------------------------------------------------------------------------------------------------------------------------------------------------------------------------------------------------------------------------------------------------------------------------------------------------------------------------------------------------------------------------------------------------------------------------------------------------------------------------------------------------------------------------------------------------------------------------------------------------------------------------------------------------------------------------------------------------------------------------------------------------------------------------------------------------------------------------------------------------------------------------------------------------------------------------------------------------------------------------------------------------------------------------------------------------------------------------------------------------------------------------------------------------------------------------------------------------------------------------------------------------------------------------------------------------------------------------------------------------------------------------------------------------------------------------------------------------------------------------------------------------------------------------------------------------------------------------------------------------------------------------------------------------------------------------------------------------------------------------------------------------------------------------------------------------------------------------------------------------------------------------------------------------------------------------------------------------------------------------------------------------------------------------------------------------------------------------------------------------------------------------------------------------------------------------------------------------|
| <p><b>MEDICAL</b></p> <p><b>Cardiovascular</b></p> <ul style="list-style-type: none"> <li>– <i>Heart failure</i>: clinical or radiological signs of congestive heart failure and specific treatment initiated.<sup>1</sup></li> <li>– <i>Acute myocardial infarction</i>: increase in cardiac biomarker values or characteristic ECG changes or imaging evidence of new loss of viable myocardium or new regional wall motion abnormality.<sup>2</sup></li> <li>– <i>Cardiac arrhythmia</i>: ECG diagnosis of new arrhythmia requiring at least a pharmacologic intervention.<sup>3</sup></li> <li>– <i>Cardiac arrest</i>: cardiopulmonary resuscitation performed.</li> <li>– <i>Deep vein thrombosis</i>: radiological confirmation of deep vein thrombosis or anticoagulation started due to clinical findings.</li> <li>– <i>Pulmonary embolism</i>: radiological evidence of pulmonary embolism.</li> <li>– <i>Cerebrovascular accident</i>: new focal or global neurologic deficit of cerebrovascular cause that persists beyond 24 h or is interrupted by death within 24 h.<sup>4</sup></li> </ul> <p><b>Respiratory</b></p> <ul style="list-style-type: none"> <li>– <i>Pneumonia</i>: Hospital acquired pneumonia, defined as presence of lung infiltrate at chest x-ray accompanied with signs of infection and initiation of antibiotic treatment.<sup>5</sup></li> <li>– <i>Lobar atelectasis</i>: radiological finding of at least one lobar collapse.<sup>3</sup></li> <li>– <i>Pleural fluid</i>: pleural effusion requiring drainage of the pleural cavity.</li> <li>– <i>Respiratory failure</i>: delayed extubation &gt; 24 hours after primary surgery, or reintubation at any time for ventilatory support.<sup>3</sup></li> <li>– <i>Pulmonary edema</i>: clinical signs and radiological confirmation.<sup>6</sup></li> </ul> <p><b>Other medical</b></p> <ul style="list-style-type: none"> <li>– <i>Acute Kidney Injury</i>: increase in serum creatinine <math>\times 2</math> from baseline or reduction of glomerular filtration rate greater than 50%.<sup>7</sup></li> <li>– <i>Urinary retention</i>: Reinsertion of indwelling urinary catheter after removal attempt or patient discharged with urinary drainage (excluding patients with permanent indwelling urinary catheter).</li> <li>– <i>Anemia</i>: low serum hemoglobin requiring transfusion of PRBC, unrelated to any identified source of bleeding.</li> <li>– <i>Hepatic dysfunction</i>: Increased serum bilirubin concentration &gt; 34 <math>\mu\text{mol/l}</math> (2 mg/dl) compared to preoperative value AND elevated liver enzymes AND has NOT undergone a pancreaticobiliary procedure.<sup>3</sup></li> <li>– <i>Acute Pancreatitis</i>: diagnosis requires 2 of the following: upper abdominal pain of acute onset often radiating through to the back; increase in serum amylase or lipase (<math>\times 3</math> normal value); cross-sectional abdominal imaging consistent with acute pancreatitis.<sup>8</sup></li> <li>– <i>Other gastrointestinal complications</i>: any other complication of the gastrointestinal tract requiring treatment (e.g. blood per rectum, diarrhea, high stoma output).</li> <li>– <i>Neurological complications</i>: any neurological complication excluding cerebrovascular events or anesthesia-related injuries (e.g. epileptic seizure)</li> <li>– <i>Psychiatric complications</i>: new psychiatric symptoms including delirium and depression, requiring pharmacological treatment.</li> </ul> <p><b>INFECTIOUS</b></p> |
|-----------------------------------------------------------------------------------------------------------------------------------------------------------------------------------------------------------------------------------------------------------------------------------------------------------------------------------------------------------------------------------------------------------------------------------------------------------------------------------------------------------------------------------------------------------------------------------------------------------------------------------------------------------------------------------------------------------------------------------------------------------------------------------------------------------------------------------------------------------------------------------------------------------------------------------------------------------------------------------------------------------------------------------------------------------------------------------------------------------------------------------------------------------------------------------------------------------------------------------------------------------------------------------------------------------------------------------------------------------------------------------------------------------------------------------------------------------------------------------------------------------------------------------------------------------------------------------------------------------------------------------------------------------------------------------------------------------------------------------------------------------------------------------------------------------------------------------------------------------------------------------------------------------------------------------------------------------------------------------------------------------------------------------------------------------------------------------------------------------------------------------------------------------------------------------------------------------------------------------------------------------------------------------------------------------------------------------------------------------------------------------------------------------------------------------------------------------------------------------------------------------------------------------------------------------------------------------------------------------------------------------------------------------------------------------------------------------------------------------------------------------------------------------------------------------------------------------------------------------------------------------------------------------------------------------------------------------------------------------------------------------------------------------------------------------------------------------------------------------------------------------------------------------------------------------------------------------------------------------------------------------------------------------------------------------------------------------------------------------------------------------------------------------------------------------------------------------------------------------------------------------------------------------------------------------------------------|

- *Urinary Tract Infection*: upper or lower urinary symptoms and urine culture with no more than two species of organisms, at least one of which is a bacteria of  $\geq 10^5$  CFU/ml.<sup>9</sup>
- *Wound infection*: Purulent drainage, with or without positive culture, from the superficial incision or any sign or symptom of infection (e.g. pain, tenderness, localized swelling and/or redness) and superficial incision is deliberately opened by the surgeon or attending physician. Not included if part of intra-peritoneal abscess.<sup>10</sup>
- *Intra- or retroperitoneal abscess*: Radiologic finding of deep collection of pus associated with systemic signs of infection or finding during reoperation.
- *Sepsis*: at least two SIRS criteria positive and a documented or suspected infection. SIRS criteria are the following: Temperature  $< 36$  or  $> 38$  °C; heart rate  $> 90$  beats per minute, respiratory frequency  $> 20$  breath per minute, leukocytosis (WBC $> 12$ ) or leukopenia (WBC $< 4$ ) AND documented or suspected infection.<sup>11</sup>
- *Other infectious complications*: any other documented infectious complication (e.g. *Clostridium difficile* colitis).

## **SURGICAL**

- *Anastomotic leak*: documentation at reoperation OR documentation by imaging technique (e.g. radiologically or endoscopically) of leakage from the surgical connection between the two bowel ends into the abdomen or pelvis with either spillage and/or fluid collection around the anastomotic site or extravasation through a wound, drain site, or anus.<sup>12</sup> In the case of rectal surgery, a pelvic abscess close to the anastomosis is also considered as anastomotic leakage.<sup>13</sup>
- *Bowel perforation*: documentation at reoperation OR radiologically of perforation of small or large bowel.<sup>6</sup>
- *Mechanical bowel obstruction*: documentation at reoperation OR radiological documentation of mechanical small or large bowel obstruction.
- *Wound dehiscence*: separation of the abdominal wall muscle fascia large enough to necessitate operative closure of the wound OR incisional hernia diagnosed after primary discharge.<sup>6</sup>
- *Bleeding*: any postoperative bleeding (e.g. intra-abdominal, gastrointestinal) requiring transfusion of at least 2 PRBC after surgery.<sup>14</sup>
- *Ileus (primary postoperative ileus)*: abdominal distention OR vomiting associated with intolerance of solid food intake or inability to pass gas or stool beyond POD3 (target day for discharge), unrelated to any other ongoing complication.
- *Other surgical complications*: any other surgical complication necessitating treatment or delaying discharge (e.g. abdominal wall hematoma).

### eMethods 3. Statistical Analysis Plan

| Variable                                                    | Type        | Time point(s)                                     | Planned analysis          | Adjustment variables included in the model                                                                                                                                | Multiple imputation model                                                                                                                                                                                                                                                                                                                                                                                                                       |
|-------------------------------------------------------------|-------------|---------------------------------------------------|---------------------------|---------------------------------------------------------------------------------------------------------------------------------------------------------------------------|-------------------------------------------------------------------------------------------------------------------------------------------------------------------------------------------------------------------------------------------------------------------------------------------------------------------------------------------------------------------------------------------------------------------------------------------------|
| <b>30-day Comprehensive Complication Index (CCI)</b>        | Continuous  | 30 days                                           | Linear regression model   | Recruitment site (fixed-effect), age, gender, ASA score, colon vs. rectal surgery, minimally invasive vs. open surgery, baseline 6MWD, BMI and Fried score (2-3 vs. 4-5). | There was no missing data for the outcome CCI. Imputation conducted for the adjustment variables baseline 6MWD (missing n=1) and BMI (missing n=1). The multiple imputation model included: CCI, recruitment site, age, gender, ASA score, colon vs. rectal surgery, minimally invasive vs. open surgery and Fried score.                                                                                                                       |
| <b>30-day Overall complications</b>                         | Dichotomous | 30 days                                           | Logistic regression model | Recruitment site (fixed-effect), age, gender, ASA score, colon vs. rectal surgery, minimally invasive vs. open surgery, baseline 6MWD, BMI and Fried score (2-3 vs. 4-5). | There was no missing data for the outcome overall complications. Imputation conducted for the adjustment variables baseline 6MWD (missing n=1) and BMI (missing n=1). The multiple imputation model included: CCI, recruitment site, age, gender, ASA score, colon vs. rectal surgery, minimally invasive vs. open surgery and Fried score.                                                                                                     |
| <b>30-day Severe complications</b>                          | Dichotomous | 30 days                                           | Logistic regression model | Recruitment site (fixed-effect), age, gender, ASA score, colon vs. rectal surgery, minimally invasive vs. open surgery, baseline 6MWD, BMI and Fried score (2-3 vs. 4-5). | There was no missing data for the outcome severe complications. Imputation conducted for the adjustment variables baseline 6MWD (missing n=1) and BMI (missing n=1). The multiple imputation model included: CCI, recruitment site, age, gender, ASA score, colon vs. rectal surgery, minimally invasive vs. open surgery and Fried score.                                                                                                      |
| <b>Primary length of stay, days</b>                         | Continuous  | Not applicable                                    | Linear regression model   | Recruitment site (fixed-effect), age, gender, ASA score, colon vs. rectal surgery, minimally invasive vs. open surgery, baseline 6MWD, BMI and Fried score (2-3 vs. 4-5). | There was no missing data for the outcome primary length of stay. Imputation conducted for the adjustment variables baseline 6MWD (missing n=1) and BMI (missing n=1). The multiple imputation model included: CCI, recruitment site, age, gender, ASA score, colon vs. rectal surgery, minimally invasive vs. open surgery and Fried score.                                                                                                    |
| <b>30-day total length of stay, days</b>                    | Continuous  | 30 days                                           | Linear regression model   | Recruitment site (fixed-effect), age, gender, ASA score, colon vs. rectal surgery, minimally invasive vs. open surgery, baseline 6MWD, BMI and Fried score (2-3 vs. 4-5). | There was no missing data for the outcome total length of stay. Imputation conducted for the adjustment variables baseline 6MWD (missing n=1) and BMI (missing n=1). Imputation conducted for the adjustment variables baseline 6MWD (missing n=1) and BMI (missing n=1). The multiple imputation model included: CCI, recruitment site, age, gender, ASA score, colon vs. rectal surgery, minimally invasive vs. open surgery and Fried score. |
| <b>30-day Emergency room visit</b>                          | Dichotomous | 30 days                                           | Logistic regression model | Recruitment site (fixed-effect), age, gender, ASA score, colon vs. rectal surgery, minimally invasive vs. open surgery, baseline 6MWD, BMI and Fried score (2-3 vs. 4-5). | There was no missing data for the outcome emergency room visit. Imputation conducted for the adjustment variables baseline 6MWD (missing n=1) and BMI (missing n=1). The multiple imputation model included: CCI, recruitment site, age, gender, ASA score, colon vs. rectal surgery, minimally invasive vs. open surgery and Fried score.                                                                                                      |
| <b>30-day Hospital readmission</b>                          | Dichotomous | 30 days                                           | Logistic regression model | Recruitment site (fixed-effect), age, gender, ASA score, colon vs. rectal surgery, minimally invasive vs. open surgery, baseline 6MWD, BMI and Fried score (2-3 vs. 4-5). | There was no missing data for the outcome hospital readmission. Imputation conducted for the adjustment variables baseline 6MWD (missing n=1) and BMI (missing n=1). The multiple imputation model included: CCI, recruitment site, age, gender, ASA score, colon vs. rectal surgery, minimally invasive vs. open surgery and Fried score.                                                                                                      |
| <b>Walking capacity: six-minute walking distance (6MWD)</b> | Continuous  | Baseline<br>Preoperative<br>4-weeks after surgery | Linear regression model   | Recruitment site (fixed-effect), age, gender, ASA score, colon vs. rectal surgery, minimally invasive vs. open surgery,                                                   | Imputation conducted for the outcomes preoperative 6MWD (missing n=25) and postoperative 6MWD (missing n=45) and for the adjustment variables baseline 6MWD (missing n=1) and BMI (missing n=1). The                                                                                                                                                                                                                                            |

|                                                         |            |                                                   |                               |                                                                                                                                                                                                                                                                                   |                                                                                                                                                                                                                                                                                                                                                                                                                                                                                                                                                                                                                                                          |
|---------------------------------------------------------|------------|---------------------------------------------------|-------------------------------|-----------------------------------------------------------------------------------------------------------------------------------------------------------------------------------------------------------------------------------------------------------------------------------|----------------------------------------------------------------------------------------------------------------------------------------------------------------------------------------------------------------------------------------------------------------------------------------------------------------------------------------------------------------------------------------------------------------------------------------------------------------------------------------------------------------------------------------------------------------------------------------------------------------------------------------------------------|
|                                                         |            |                                                   |                               | baseline 6MWD (in deciles), BMI and Fried score (2-3 vs. 4-5).                                                                                                                                                                                                                    | multiple imputation model included: CCI, recruitment site, age, gender, ASA score, colon vs. rectal surgery, minimally invasive vs. open surgery and Fried score.                                                                                                                                                                                                                                                                                                                                                                                                                                                                                        |
| <b>SF-36 Total Physical<br/>SF-36 Total Mental</b>      | Continuous | Baseline<br>Preoperative<br>4-weeks after surgery | Linear<br>regression<br>model | Recruitment site (fixed-effect), age, gender, ASA score, colon vs. rectal surgery, minimally invasive vs. open surgery, baseline 6MWD, BMI, Fried score (2-3 vs. 4-5), baseline Total Physical (in deciles) and baseline Total Mental (in deciles).                               | Imputation conducted for the outcomes preoperative Total Physical (missing n=35), preoperative Total Mental (missing n=35), postoperative Total Physical (missing n=42) and postoperative Total Mental (missing n=42) and for the adjustment variables baseline Total Physical (missing n=5), baseline Total Mental (missing n=5), baseline 6MWD (missing n=1) and BMI (missing n=1). The multiple imputation model included: CCI, recruitment site, age, gender, ASA score, colon vs. rectal surgery, minimally invasive vs. open surgery and Fried score.                                                                                              |
| <b>HADS anxiety<br/>HADS anxiety</b>                    | Continuous | Baseline<br>Preoperative<br>4-weeks after surgery | Linear<br>regression<br>model | Recruitment site (fixed-effect), age, gender, ASA score, colon vs. rectal surgery, minimally invasive vs. open surgery, baseline 6MWD, BMI, Fried score (2-3 vs. 4-5), baseline HADS anxiety (in deciles) and baseline HADS depression (in deciles).                              | Imputation conducted for the outcomes preoperative HADS anxiety (missing n=36), preoperative HADS depression (missing n=36), postoperative HADS anxiety (missing n=43) and postoperative HADS depression (missing n=43) and for the adjustment variables baseline HADS anxiety (missing n=5), baseline HADS depression (missing n=5) baseline HADS anxiety (missing n=5), baseline HADS depression (missing n=5), baseline 6MWD (missing n=1) and BMI (missing n=1). The multiple imputation model included: CCI, recruitment site, age, gender, ASA score, colon vs. rectal surgery, minimally invasive vs. open surgery and Fried score.               |
| <b>Energy Expenditure:<br/>CHAMPS<br/>questionnaire</b> | Continuous | Baseline<br>Preoperative<br>4-weeks after surgery | Linear<br>regression<br>model | Recruitment site (fixed-effect), age, gender, ASA score, colon vs. rectal surgery, minimally invasive vs. open surgery, baseline 6MWD, BMI, Fried score (2-3 vs. 4-5), baseline light energy expenditure (in deciles), baseline moderate-vigorous energy expenditure (in deciles) | Imputation conducted for the preoperative light energy expenditure (missing n=33), preoperative moderate-vigorous energy expenditure (missing n=33), postoperative light energy expenditure (missing n=42) and postoperative moderate-vigorous energy expenditure (missing n=42) and for the adjustment variables baseline light energy expenditure (missing n=5), baseline moderate-vigorous energy expenditure (missing n=5), baseline 6MWD (missing n=1) and BMI (missing n=1). The multiple imputation model included: CCI, recruitment site, age, gender, ASA score, colon vs. rectal surgery, minimally invasive vs. open surgery and Fried score. |

**eTable 1.** Detailed Description of Postoperative Complications in the Prehabilitation vs Rehabilitation Groups

|                                      |          | <b>Prehabilitation</b> |          | <b>Rehabilitation</b> |
|--------------------------------------|----------|------------------------|----------|-----------------------|
|                                      | <b>n</b> |                        | <b>n</b> |                       |
| <b>Medical Complications</b>         |          |                        |          |                       |
| <b>Cardiovascular</b>                | 55       | 4 (7%)                 | 55       | 3(5%)                 |
| Heart failure                        | 55       | 3(5%)                  | 55       | 0                     |
| Arrhythmias                          | 55       | 1(2%)                  | 55       | 2(4%)                 |
| Deep vein thrombosis                 | 55       | 1(2%)                  | 55       | 2(4%)                 |
| <b>Respiratory</b>                   | 55       | 9(16%)                 | 55       | 9(16%)                |
| Pneumonia                            | 54       | 5(9%)                  | 55       | 5(9%)                 |
| Lobar atelectasis                    | 55       | 3(5%)                  | 55       | 1(2%)                 |
| Pleural fluid                        | 55       | 1(2%)                  | 55       | 0                     |
| Respiratory failure                  | 55       | 3(5%)                  | 55       | 3(5%)                 |
| <b>Infectious</b>                    | 55       | 6(11%)                 | 55       | 7(13%)                |
| Urinary tract infection              | 55       | 1(2%)                  | 55       | 2(4%)                 |
| Wound infection                      | 55       | 2(4%)                  | 55       | 1(2%)                 |
| Intra- or retro-peritoneal infection | 55       | 2(4%)                  | 55       | 1(2%)                 |
| Sepsis                               | 55       | 2(4%)                  | 55       | 0                     |
| Other                                | 55       | 0                      | 55       | 3(5%)                 |
| <b>Other medical</b>                 | 55       | 12(22%)                | 55       | 13(24%)               |
| Acute kidney injury                  | 55       | 6(11%)                 | 54       | 4(7%)                 |
| Urinary retention                    | 55       | 1(2%)                  | 55       | 3(5%)                 |
| Anemia                               | 55       | 4(7%)                  | 55       | 0                     |
| Other GI <sup>a</sup>                | 55       | 5(9%)                  | 55       | 6(11%)                |
| Psychiatric complications            | 55       | 3(5%)                  | 55       | 1(2%)                 |
| <b>Surgical complications</b>        | 55       | 14(25%)                | 55       | 14(25%)               |
| Anastomotic leak                     | 55       | 2(4%)                  | 55       | 3(6%)                 |
| Bowel perforation                    | 55       | 0                      | 55       | 1(2%)                 |
| Ileus                                | 55       | 12(22%)                | 55       | 7(13%)                |
| Wound dehiscence                     | 55       | 2(4%)                  | 55       | 1(2%)                 |
| Bleeding                             | 55       | 2(4%)                  | 55       | 5(9%)                 |
| Other                                | 55       | 0                      | 55       | 1(2%)                 |

**Data are presented as n (%)**

<sup>a</sup> Gastrointestinal

**eTable 2.** Intention to Treat Unadjusted Postoperative Outcomes in the Prehabilitation vs Rehabilitation Groups

|                                                    | <b>Prehabilitation<br/>n=55</b> | <b>Rehabilitation<br/>n=55</b> | <b>Unadjusted estimate<br/>(95% CI)<sup>a</sup></b> | <b>P<br/>Value</b> |
|----------------------------------------------------|---------------------------------|--------------------------------|-----------------------------------------------------|--------------------|
| <b>30-day Comprehensive<br/>Complication Index</b> | 12.7 (21.5)<br>0 [0-12.2]       | 15.7(25.3)<br>0 [0-29.6]       | MD -3.1(-11.9 to 5.8)                               | 0.49               |
| <b>30-day Overall complications</b>                | 25(45%)                         | 25(45%)                        | OR 1.0(0.47 to 2.1)                                 | 1.00               |
| <b>30-day Severe complications</b>                 | 7(13%)                          | 11(20%)                        | OR 0.58(0.21 to 1.6)                                | 0.31               |
| <b>Primary length of stay, days</b>                | 4[3-8]                          | 4[3-8]                         | HR 0.95(0.65 to 1.4)                                | 0.79               |
| <b>30-day Total Length of stay,<br/>days</b>       | 4[3-8]                          | 5[3-9]                         | MD -3.9(-14.8 to 7.0)                               | 0.48               |
| <b>30-day Emergency room visit</b>                 | 3(5%)                           | 6(11%)                         | OR 0.47(0.11 to 2.0)                                | 0.31               |
| <b>30-day Hospital readmission</b>                 | 2(4%)                           | 5(9%)                          | OR 0.38(0.07 to 2.0)                                | 0.26               |

**Data are presented as mean (SD), median [IQR], or n (%)**

MD: Mean difference; OR: Odds ratio; HR: Hazard ratio

<sup>a</sup> Coefficients derived with imputation of missing data and no adjustment for confounders. There was no missing data for the variables described in this table, so imputation was conducted only for adjustment variables. Details about the multiple imputation model is described in eMethods 3.



**eTable 3.** Intention to Treat Unadjusted Walking Capacity in the Prehabilitation vs Rehabilitation Groups

|                                              | Prehabilitation |              | Rehabilitation |              | Unadjusted estimate<br>(95% CI) <sup>a</sup> | P<br>Value |
|----------------------------------------------|-----------------|--------------|----------------|--------------|----------------------------------------------|------------|
|                                              | n               |              | n              |              |                                              |            |
| <b>Baseline 6MWD, m</b>                      | 55              | 325.3(114.3) | 54             | 304.0(107.3) |                                              |            |
| <b>Preoperative 6MWD, m</b>                  | 47              | 346.1(117.8) | 38             | 315.8(107.5) | MD 39.2(-5.2 to 83.6)                        | 0.08       |
| 6MWD improved<br>preoperatively <sup>b</sup> | 47              | 26(55%)      | 38             | 10(26%)      | OR 2.0(0.86 to 4.8)                          | 0.10       |
| <b>Postoperative (4 weeks)<br/>6MWD, m</b>   | 38              | 336.4(121.8) | 30             | 286.1(105.1) | MD 39.2(-8.2 to 86.6)                        | 0.10       |
| 6MWD recovered at 4<br>weeks <sup>c</sup>    | 38              | 26(68%)      | 30             | 16(53%)      | OR 1.4(0.58 to 3.5)                          | 0.45       |

**Data presented as mean (SD), or n(%)**

<sup>a</sup> Coefficients derived with imputation of missing data and no adjustment for confounders. Details about the multiple imputation model is described in eMethods 3.

<sup>b</sup> improvement of 6MWD above 20m in comparison to baseline; <sup>c</sup> recovered to 6MWD within 20 meters of the baseline value or above.

**eTable 4.** Intention to Treat Unadjusted Patient-Reported Outcome Measures in the Prehabilitation vs Rehabilitation Groups

|                                      | Prehabilitation |                | Rehabilitation |            | Unadjusted estimate<br>(95% CI) <sup>a</sup> | P<br>Value |
|--------------------------------------|-----------------|----------------|----------------|------------|----------------------------------------------|------------|
|                                      | n               |                | n              |            |                                              |            |
| <b>SF-36 Subscales</b>               |                 |                |                |            |                                              |            |
| <b>Total Physical</b>                |                 |                |                |            |                                              |            |
| Baseline                             | 53              | 49.4(21.2)     | 52             | 52.9(18.7) |                                              |            |
| Before Surgery                       | 42              | 57.1(19.3)     | 33             | 58.7(19.4) | MD -1.3(-9.1 to 6.5)                         | 0.73       |
| 4 weeks after surgery                | 38              | 49.7(20.2)     | 30             | 51.1(14.7) | MD -1.4(-8.0 to 5.1)                         | 0.66       |
| <b>Total Mental</b>                  |                 |                |                |            |                                              |            |
| Baseline                             | 53              | 54.2(23.1)     | 52             | 58.8(20.2) |                                              |            |
| Before surgery                       | 42              | 59.2(20.8)     | 33             | 66.0(19.4) | MD -4.8(-13.0 to 3.4)                        | 0.24       |
| 4 weeks after Surgery                | 38              | 55.3(22.6)     | 30             | 63.6(15.3) | MD -5.2(-12.5 to 2.2)                        | 0.17       |
| <b>HADS anxiety</b>                  |                 |                |                |            |                                              |            |
| Baseline                             | 52              | 6[4-8]         | 53             | 5[2-8]     |                                              |            |
| Before surgery                       | 41              | 6[4-8]         | 33             | 4[1-7]     | MD 1.3(-0.29 to 2.8)                         | 0.11       |
| 4 weeks after surgery                | 37              | 5[2-7]         | 31             | 4[1-8]     | MD -1.6(-6.7 to 3.5)                         | 0.53       |
| <b>HADS Depression</b>               |                 |                |                |            |                                              |            |
| Baseline                             | 52              | 5[3-7.5]       | 53             | 4[3-9]     |                                              |            |
| Before surgery                       | 41              | 4[2-6]         | 33             | 4[2-7]     | MD -0.09(-1.6 to 1.4)                        | 0.90       |
| 4 weeks after surgery                | 37              | 4[2-5]         | 31             | 4[1-7]     | MD -0.04(-1.6 to 1.5)                        | 0.96       |
| <b>Energy Expenditure</b>            |                 |                |                |            |                                              |            |
| <b>Baseline</b>                      |                 |                |                |            |                                              |            |
| Light energy expenditure             | 52              | 20.8[9-51]     | 53             | 16[1-65]   |                                              |            |
| Moderate-vigorous energy expenditure | 52              | 4[0-21]        | 53             | 0[0-3.5]   |                                              |            |
| <b>Before Surgery</b>                |                 |                |                |            |                                              |            |
| Light energy expenditure             | 44              | 23.8[8.5-58.3] | 33             | 15[6.5-42] |                                              |            |
| Moderate-vigorous energy expenditure | 44              | 17.6[10.2-33]  | 33             | 3[0-13]    | MD 13.4(-2.4 to 29.2)                        | 0.10       |
| <b>4 weeks</b>                       |                 |                |                |            |                                              |            |
| Light physical energy expenditure    | 38              | 20[5-37.5]     | 30             | 16.9[5-35] |                                              |            |
| Moderate-vigorous energy expenditure | 38              | 12[0-31.3]     | 30             | 13.5[0-36] | MD -2.9(-21.0 to 15.3)                       | 0.75       |

Data presented as mean (SD), or n(%)

<sup>a</sup> Coefficients derived with imputation of missing data and no adjustment for confounders. Details about the multiple imputation model is described in eMethods 3.

SF-36: 36-Item Short Form Health Survey. Range 0–100. Higher values represent better scores; HADS: Hospital Anxiety and Depression Scale. Range 0–21. Higher values represent worse scores.

**eTable 5.** Per Protocol Baseline and Operative Characteristics in the Prehabilitation vs Rehabilitation Groups

|                                     | Prehabilitation |                    |    |                 | Rehabilitation |                 |
|-------------------------------------|-----------------|--------------------|----|-----------------|----------------|-----------------|
|                                     | n               | <75% compliance    | n  | ≥75% compliance | n              |                 |
| <b>Age, years</b>                   | 22              | 74.5[72-82]        | 33 | 78[72.5-84.5]   | 55             | 82[75-84]       |
| ≥75 years old                       | 22              | 11(50%)            | 33 | 21(64%)         | 55             | 42(76%)         |
| <b>Male Sex</b>                     | 22              | 11(50%)            | 33 | 18(55%)         | 55             | 23(42%)         |
| <b>Body Composition</b>             |                 |                    |    |                 |                |                 |
| Weight, kg                          | 22              | 67.3[56.3-73.5]    | 33 | 65.5[61.8-86.2] | 54             | 71.6[57-79.7]   |
| Lean Body Mass, kg                  | 22              | 46.5 (7.8)         | 33 | 47.1(10.0)      | 54             | 46.2(10.2)      |
| Fat, %                              | 22              | 29.7[18.5-39.1]    | 33 | 34.3[29.3-38.9] | 54             | 35.9[25.4-41.1] |
| BMI, kg/m <sup>2</sup>              | 22              | 23.5[21.3-29.2]    | 33 | 26.0[24.0-30.7] | 54             | 26.4[23.8-30.6] |
| ≥30                                 | 22              | 5(23%)             | 33 | 9(27%)          | 54             | 16(30%)         |
| <b>Baseline 6MWD, m</b>             |                 | 366.3 (118.1)      |    | 297.9(104.8)    | 54             | 304.0 (107.3)   |
| % predicted                         | 22              | 66.4 [56.1 – 73.8] | 33 | 54.8[34.6-61.0] | 54             | 52.7[40.5-63.6] |
| < 400m                              | 22              | 13(59%)            | 33 | 27(82%)         | 54             | 44(81%)         |
| <b>Grip Strength</b>                | 22              | 24.9(7.8)          | 33 | 21.3(8.4)       | 55             | 21.0(6.7)       |
| <b>Frailty Score</b>                |                 |                    |    |                 |                |                 |
| 2                                   | 22              | 11(50%)            | 33 | 14(42%)         | 55             | 17(31%)         |
| 3                                   | 22              | 8(36%)             | 33 | 8(24%)          | 55             | 22(40%)         |
| 4                                   | 22              | 1(5%)              | 33 | 6(18%)          | 55             | 10(18%)         |
| 5                                   | 22              | 2(9%)              | 33 | 5(15%)          | 55             | 6(11%)          |
| <b>Comorbidities</b>                |                 |                    |    |                 |                |                 |
| Diabetes Mellitus                   | 22              | 7(32%)             | 33 | 12(36%)         | 55             | 21(38%)         |
| Hypertension                        | 22              | 9(41%)             | 33 | 20(61%)         | 55             | 42(76%)         |
| Cardiovascular diseases             | 22              | 5(23%)             | 33 | 11(33%)         | 55             | 19(35%)         |
| Atrial Fibrillation                 | 22              | 2(9%)              | 33 | 7(21%)          | 55             | 5(9%)           |
| OSA                                 | 22              | 0                  | 33 | 5(15%)          | 55             | 5(9%)           |
| COPD                                | 22              | 2(9%)              | 33 | 6(18%)          | 55             | 3(5%)           |
| Arthritis/connective tissue disease | 21              | 5(24%)             | 33 | 10(30%)         | 54             | 23(43%)         |
| Dyslipidemia                        | 22              | 9(41%)             | 33 | 18(55%)         | 54             | 26(48%)         |
| Hypothyroidism                      | 22              | 4(18%)             | 33 | 8(24%)          | 55             | 11(20%)         |
| Asthma                              | 22              | 0                  | 33 | 7(21%)          | 55             | 1(2%)           |
| Charlson Index                      | 22              | 3[2-4.3]           | 33 | 3[2-4]          | 55             | 4[3-5]          |
| <b>ASA status</b>                   |                 |                    |    |                 |                |                 |
| 2                                   | 22              | 9(41%)             | 33 | 10(30%)         | 55             | 9(16%)          |
| 3                                   | 22              | 11(50%)            | 33 | 22(67%)         | 55             | 43(78%)         |
| 4                                   | 22              | 2(9%)              | 33 | 1(3%)           | 55             | 3(5%)           |
| <b>Metabolic status</b>             |                 |                    |    |                 |                |                 |
| CRP, mg/L                           | 19              | 6.3[1.5-22.9]      | 31 | 6.0[2.3-24.2]   | 47             | 4.5[1.7-14.5]   |
| Albumin, g/L                        | 20              | 38.7 (4.4)         | 33 | 39.1(5.0)       | 52             | 38.3 (4.0)      |

|                                     |    |                 |    |                  |    |               |
|-------------------------------------|----|-----------------|----|------------------|----|---------------|
| HbA1C, %                            | 19 | 5.9(0.60)       | 28 | 6.4(0.97)        | 49 | 6.3 (1.4)     |
| Hemoglobin, g/L                     | 21 | 118.3 (18.5)    | 33 | 115.5(21.1)      | 51 | 111.6 (19.4)  |
| Energy Expenditure, kcal/kg/week    | 20 | 36.4[10.6-80.3] | 32 | 38.4[15.3-80.4]  | 53 | 23.0 [5-68.5] |
| <b>Subjective Global Assessment</b> |    |                 |    |                  |    |               |
| A                                   | 21 | 6(29%)          | 33 | 10(30%)          | 45 | 20(44%)       |
| B                                   | 21 | 9(43%)          | 33 | 18(55%)          | 45 | 12(27%)       |
| C                                   | 21 | 6(29%)          | 33 | 5(15%)           | 45 | 13(29%)       |
| <b>Oncology</b>                     |    |                 |    |                  |    |               |
| Rectal Cancer Site                  | 22 | 9(41%)          | 33 | 9(27%)           | 55 | 13(24%)       |
| Neoadjuvant chemotherapy            | 22 | 5(23%)          | 33 | 2(6%)            | 54 | 6(11%)        |
| <b>Tumor stage</b>                  |    |                 |    |                  |    |               |
| TNM stage 0-I                       | 22 | 6(27%)          | 33 | 12(36%)          | 53 | 15(28%)       |
| TNM stage II                        | 22 | 5(23%)          | 33 | 10(30%)          | 53 | 18(34%)       |
| TNM stage III                       | 22 | 10(45%)         | 33 | 9(27%)           | 53 | 16(30%)       |
| TNM stage IV                        | 22 | 1(5%)           | 33 | 2(6%)            | 53 | 4(8%)         |
| <b>Surgical approach</b>            |    |                 |    |                  |    |               |
| Open                                | 22 | 8(36%)          | 33 | 5(15%)           | 55 | 10(18%)       |
| Minimally Invasive                  | 22 | 14(64%)         | 33 | 28(85%)          | 55 | 45(82%)       |
| <b>Type of surgery</b>              |    |                 |    |                  |    |               |
| Ileocecal resection                 | 22 | 1(5%)           | 33 | 1(3%)            | 55 | 1(2%)         |
| Right hemicolectomy                 | 22 | 8(36%)          | 33 | 15(45%)          | 55 | 23(42%)       |
| Left hemicolectomy                  | 22 | 2(9%)           | 33 | 3(9%)            | 55 | 8(15%)        |
| Subtotal colectomy                  | 22 | 0               | 33 | 2(6%)            | 55 | 1(2%)         |
| Anterior/sigmoid resection          | 22 | 2(9%)           | 33 | 4(12%)           | 55 | 9(16%)        |
| Transverse colectomy                | 22 | 0               | 33 | 1(3%)            | 55 | 1(2%)         |
| Low anterior resection              | 22 | 4(18%)          | 33 | 6(18%)           | 55 | 7(13%)        |
| Abdominoperineal resection          | 22 | 3(14%)          | 33 | 1(3%)            | 55 | 4(7%)         |
| Other bowel surgery                 | 22 | 2(9%)           | 33 | 0                | 55 | 1(2%)         |
| <b>Surgery</b>                      |    |                 |    |                  |    |               |
| Stoma creation                      | 22 | 10(45%)         | 33 | 5(15%)           | 55 | 9(16%)        |
| Duration of surgery, minutes        | 22 | 180[110-338.8]  | 33 | 195[122.5-280.0] | 55 | 180[130-300]  |
| Intraoperative blood loss, mL       | 22 | 100[68.8-312.5] | 33 | 100[50-200]      | 55 | 100[50-200]   |

**Data are presented as mean (SD), median [IQR], or n (%)**

BMI: body mass index; 6MWD: 6-minute walk distance; OSA: obstructive sleep apnea; COPD: chronic obstructive pulmonary disease; ASA: American Society of Anesthesiologists; CRP: C-reactive protein; HbA1C: glycated hemoglobin; Minimally Invasive: Laparoscopic or Transanal minimally invasive surgery (TAMIS); TNM = tumor–node–metastasis.

**eTable 6.** Per Protocol Adjusted postoperative outcomes in the Prehabilitation vs Rehabilitation Groups

|                                     | <b>Prehabilitation<br/>(≥75%<br/>compliance)<br/>n=33</b> | <b>Rehabilitation<br/>n=55</b> | <b>Adjusted estimate<br/>(95% CI)<sup>a</sup></b> | <b>P Value</b> |
|-------------------------------------|-----------------------------------------------------------|--------------------------------|---------------------------------------------------|----------------|
|                                     | 11.1(22.6)                                                | 15.7(25.3)                     | MD:-4.3(-14.5 to 6.0)                             | 0.41           |
| <b>30- day CCI</b>                  | 0 [0-8.7]                                                 | 0 [0-29.6]                     |                                                   |                |
| <b>Overall complications rate</b>   | 15(45%)                                                   | 25(45%)                        | OR:0.84 (0.30 to 2.3)                             | 0.74           |
| <b>Severe complications rate</b>    | 3(9%)                                                     | 11(20%)                        | OR:0.35(0.07 to 1.70)                             | 0.19           |
| <b>Primary length of stay, days</b> | 5[3-7]                                                    | 4[3-8]                         | HR:21.4(-2.4 to 1.9)                              | 0.85           |
| <b>Total Length of stay, days</b>   | 5[3-7]                                                    | 5[3-9]                         | MD:-6.9[-21.7 to 7.9]                             | 0.35           |
| <b>Emergency room visit rate</b>    | 2(6%)                                                     | 6(11%)                         | OR:0.22(0.03 to 2.0)                              | 0.18           |
| <b>Hospital readmission rate</b>    | 1(3%)                                                     | 5(9%)                          | OR:0.07(0.004 to 1.26)                            | 0.07           |

**Data are presented as mean (SD), median [IQR], or n (%)**

MD: Mean difference; OR: Odds ratio; HR: Hazard ratio

<sup>a</sup> Coefficients derived with imputation of missing data and adjustment for confounders, including recruitment site, age, gender, ASA score, colon vs. rectal surgery, minimally invasive vs. open surgery, baseline 6MWD, BMI and Fried score (2-3 vs. 4-5). There was no missing data for the variables described in this table, so imputation was conducted only for adjustment variables. Details about the multiple imputation model is described in eMethods 3.

**eTable 7.** Per Protocol Adjusted Walking Capacity in the Prehabilitation vs Rehabilitation Groups

|                                              | Prehabilitation<br>(≥75%<br>compliance) |              | Rehabilitation |               | Adjusted estimate<br>(95%CI) <sup>a</sup> | P<br>Value |
|----------------------------------------------|-----------------------------------------|--------------|----------------|---------------|-------------------------------------------|------------|
|                                              | n                                       |              | n              |               |                                           |            |
| <b>Baseline 6MWD, m</b>                      | 33                                      | 297.9(104.8) | 54             | 304.0 (107.3) |                                           |            |
| <b>Preoperative 6MWD, m</b>                  | 32                                      | 340.4(109.6) | 38             | 315.8(107.5)  | MD 29.1(2.6 to<br>55.6)                   | 0.03       |
| 6MWD improved<br>preoperatively <sup>b</sup> | 32                                      | 20(63%)      | 38             | 10(26%)       | OR 3.8(1.3 to 11.1)                       | 0.02       |
| <b>Postoperative (4 weeks)<br/>6MWD,m</b>    | 27                                      | 335.7(122.5) | 30             | 286.1(105.1)  | MD 38.4(-3.1 to<br>80.0)                  | 0.07       |
| 6MWD recovered at 4<br>weeks <sup>c</sup>    | 27                                      | 20(74%)      | 30             | 16(53%)       | OR 3.1(0.81 to 11.7)                      | 0.10       |

**Data presented as mean (SD), or n(%)**

<sup>a</sup> Coefficients derived with imputation of missing data and adjustment for confounders, including recruitment site, age, gender, ASA score, colon vs. rectal surgery, minimally invasive vs. open surgery, baseline 6MWD (in deciles), BMI and Fried score (2-3 vs. 4-5). Details about the multiple imputation model is described in eMethods 3.

<sup>b</sup> improvement of 6MWD above 20m in comparison to baseline; <sup>c</sup> recovered to 6MWD within 20 meters of the baseline value or above

**eTable 8.** Per Protocol Adjusted Patient-Reported Outcome Measures in the Prehabilitation vs Rehabilitation Groups

|                                      | Prehabilitation<br>(≥75%<br>compliance) |               | Rehabilitation |            | Adjusted estimate<br>(95%CI) <sup>a</sup> | P<br>Value |
|--------------------------------------|-----------------------------------------|---------------|----------------|------------|-------------------------------------------|------------|
|                                      | n                                       |               | n              |            |                                           |            |
| <b>SF-36 Subscales</b>               |                                         |               |                |            |                                           |            |
| <b>Total Physical</b>                |                                         |               |                |            |                                           |            |
| Baseline                             | 32                                      | 49.1(20.9)    | 52             | 52.9(18.7) |                                           |            |
| Before Surgery                       | 31                                      | 57.8(19.0)    | 33             | 58.7(19.4) | MD 2.4(-4.6 to 9.5)                       | 0.49       |
| 4 weeks after surgery                | 27                                      | 51.3(22.0)    | 30             | 51.1(14.7) | MD 1.5(-6.2 to 9.1)                       | 0.70       |
| <b>Total Mental</b>                  |                                         |               |                |            |                                           |            |
| Baseline                             | 32                                      | 52.8(22.0)    | 52             | 58.8(20.2) |                                           |            |
| Before surgery                       | 31                                      | 61.4(20.0)    | 33             | 66.0(19.4) | MD 1.0(-7.4 to 9.5)                       | 0.81       |
| 4 weeks after Surgery                | 27                                      | 58.7(22.3)    | 30             | 63.6(15.3) | MD 1.1(-6.8 to 9.0)                       | 0.79       |
| <b>HADS anxiety</b>                  |                                         |               |                |            |                                           |            |
| Baseline                             | 32                                      | 6[4-7.5]      | 53             | 5[2-8]     |                                           |            |
| Before surgery                       | 31                                      | 6[3-9]        | 33             | 4[1-7]     | MD 1.0(-0.46 to 2.5)                      | 0.17       |
| 4 weeks after surgery                | 26                                      | 4.5[2-7]      | 31             | 4[1-8]     | MD -2.0(-7.9 to 3.9)                      | 0.50       |
| <b>HADS Depression</b>               |                                         |               |                |            |                                           |            |
| Baseline                             | 32                                      | 5.5[3-7.5]    | 53             | 4[3-9]     |                                           |            |
| Before surgery                       | 31                                      | 4[1-6]        | 33             | 4[2-7]     | MD -0.64(-1.9 to 0.64)                    | 0.32       |
| 4 weeks after surgery                | 26                                      | 3[1-5]        | 31             | 4[1-7]     | MD -0.71(-2.4 to 0.94)                    | 0.39       |
| <b>Energy Expenditure</b>            |                                         |               |                |            |                                           |            |
| <b>Baseline</b>                      |                                         |               |                |            |                                           |            |
| Light energy expenditure             | 32                                      | 26[9.3-53]    | 53             | 16[1-65]   |                                           |            |
| Moderate-vigorous energy expenditure | 32                                      | 4[0-19]       | 53             | 0[0-3.5]   |                                           |            |
| <b>Before Surgery</b>                |                                         |               |                |            |                                           |            |
| Light energy expenditure             | 31                                      | 35[12.5-64]   | 33             | 15[6.5-42] |                                           |            |
| Moderate-vigorous energy expenditure | 31                                      | 17.5[10.5-31] | 33             | 3[0-13]    | MD 5.2(-9.8 to 20.2)                      | 0.49       |
| <b>4 weeks</b>                       |                                         |               |                |            |                                           |            |
| Light energy expenditure             | 27                                      | 21.3[5-38.5]  | 30             | 16.9[5-35] |                                           |            |
| Moderate-vigorous energy expenditure | 27                                      | 18[0-33.2]    | 30             | 13.5[0-36] | MD -1.9(-23.6 to 19.9)                    | 0.86       |

**Data presented as mean (SD), or n(%)**

<sup>a</sup> Coefficients derived with imputation of missing data and adjustment for confounders, including recruitment site, age, gender, ASA score, colon vs. rectal surgery, minimally invasive vs. open surgery, baseline 6MWD, BMI, Fried score (2-3 vs. 4-5) and baseline scores of the respective measures (in deciles). Details about the multiple imputation model is described in eMethods 3.

SF-36: 36-Item Short Form Health Survey. Range 0–100. Higher values represent better scores; HADS: Hospital Anxiety and Depression Scale. Range 0–21. Higher values represent worse scores.



## eReferences

1. Zannad F, Garcia AA, Anker SD, et al. Clinical outcome endpoints in heart failure trials: a European Society of Cardiology Heart Failure Association consensus document. *Eur J Heart Fail* 2013;15:1082-94.
2. Thygesen K, Alpert JS, Jaffe AS, et al. Third universal definition of myocardial infarction. *J Am Coll Cardiol* 2012;60:1581-98.
3. Buzby GP, Knox LS, Crosby LO, et al. Study protocol: a randomized clinical trial of total parenteral nutrition in malnourished surgical patients. *Am J Clin Nutr* 1988;47:366-81.
4. Ng JL, Chan MT, Gelb AW. Perioperative stroke in noncardiac, nonneurosurgical surgery. *Anesthesiology* 2011;115:879-90.
5. Guidelines for the management of adults with hospital-acquired, ventilator-associated, and healthcare-associated pneumonia. *American journal of respiratory and critical care medicine* 2005;171:388-416.
6. Lang M, Niskanen M, Miettinen P, Alhava E, Takala J. Outcome and resource utilization in gastroenterological surgery. *Br J Surg* 2001;88:1006-14.
7. Bellomo R. Defining, quantifying, and classifying acute renal failure. *Crit Care Clin* 2005;21:223-37.
8. Banks PA, Bollen TL, Dervenis C, et al. Classification of acute pancreatitis--2012: revision of the Atlanta classification and definitions by international consensus. *Gut* 2013;62:102-11.
9. Dudeck MA, Horan TC, Peterson KD, et al. National Healthcare Safety Network (NHSN) report, data summary for 2009, device-associated module. *Am J Infect Control* 2011;39:349-67.
10. Horan TC, Gaynes RP, Martone WJ, Jarvis WR, Emori TG. CDC definitions of nosocomial surgical site infections, 1992: a modification of CDC definitions of surgical wound infections. *Infect Control Hosp Epidemiol* 1992;13:606-8.
11. Bone RC, Balk RA, Cerra FB, et al. Definitions for sepsis and organ failure and guidelines for the use of innovative therapies in sepsis. The ACCP/SCCM Consensus Conference Committee. American College of Chest Physicians/Society of Critical Care Medicine. *Chest* 1992;101:1644-55.
12. Trencheva K, Morrissey KP, Wells M, et al. Identifying important predictors for anastomotic leak after colon and rectal resection: prospective study on 616 patients. *Ann Surg* 2013;257:108-13.
13. Rahbari NN, Weitz J, Hohenberger W, et al. Definition and grading of anastomotic leakage following anterior resection of the rectum: a proposal by the International Study Group of Rectal Cancer. *Surgery* 2010;147:339-51.
14. Bozzetti F, Braga M, Gianotti L, Gavazzi C, Mariani L. Postoperative enteral versus parenteral nutrition in malnourished patients with gastrointestinal cancer: a randomised multicentre trial. *The Lancet* 2001;358:1487-92.
