# Supplementary material
Source: PubMed Central journal article supplement (PMC6990653)
Supplement: jamasurg-155-233-s003.pdf [file jamasurg-155-233-s003.pdf]

## Data Sharing Statement

Carli. Effect of Multimodal Prehabilitation vs Postoperative Rehabilitation on 30-Day Postoperative Complications for Frail Patients Undergoing Resection of Colorectal Cancer. *JAMA Surg.* Published January 22, 2020. 10.1001/jamasurg.2019.5474

### Data

**Data available:** No

### Additional Information

**Explanation for why data not available:** Data will be provided by PI, upon request
